# Supplementary material
Source: PubMed Central journal article supplement (PMC4843670)
Supplement: rsif20151022supp1.pdf [file rsif20151022supp1.pdf]

| Transportation Networks           |                                                                                                                       |                                                                                                                                                                                                                                                                                                                                                                                                                                                                                                                                                                                                       |
|-----------------------------------|-----------------------------------------------------------------------------------------------------------------------|-------------------------------------------------------------------------------------------------------------------------------------------------------------------------------------------------------------------------------------------------------------------------------------------------------------------------------------------------------------------------------------------------------------------------------------------------------------------------------------------------------------------------------------------------------------------------------------------------------|
| Disruption type                   | Pathways to resilience                                                                                                | Social insect example                                                                                                                                                                                                                                                                                                                                                                                                                                                                                                                                                                                 |
| Traffic congestion                | <b>Resist</b> traffic congestions by building traffic-resistant topology or through behaviours such as lane formation | Leaf cutter ants, <i>Atta colombica</i> , form lanes which follow priority rules as congestion increases. Returning laden ants are prioritised, followed closely by returning unladen ants. Ants do not attempt to overtake those in front. This decreases head on collisions and increases information transfer [24]. Despite a forced decrease in speed, the foraging efficiency increases (up to 6 times pre-congestion conditions), potentially due to the increased communication [118].<br><br><i>Atta cephalotes</i> clear trunk trails to maintain a width that maximizes traffic flow [119]. |
|                                   | <b>Redirect</b> traffic to alternate routes of existing network                                                       | <i>Lasius niger</i> ants respond to increases in traffic by redirecting to additional trails, thus preventing congestion [103]. They are also capable of down regulating pheromone deposition in response to crowded conditions to discourage further congestion [120].                                                                                                                                                                                                                                                                                                                               |
|                                   | Alleviate traffic congestion by building new routes ( <b>Reconstruction</b> )                                         |                                                                                                                                                                                                                                                                                                                                                                                                                                                                                                                                                                                                       |
| Obstructions                      | <b>Resist</b> obstruction by building robust transportation network                                                   | Meat ants build networks that balance cost and robustness [21, 22].                                                                                                                                                                                                                                                                                                                                                                                                                                                                                                                                   |
|                                   | <b>Redirect</b> flows around obstruction                                                                              | Individually foraging desert ants, <i>Cataglyphis fortis</i> , update the bearing of their journey to accurately navigate home when they are forced to follow a detour. Desert ants do not use pheromone trails, so each individual is capable of navigating around an obstruction to return to the nest [104].                                                                                                                                                                                                                                                                                       |
|                                   | <b>Reconstruct</b> network by removing obstruction                                                                    | Leaf-cutting ants, <i>Atta columbica</i> , will remove obstacles, such as small litter items from their established trunk trails [105]. Meat ants ( <i>Iridomyrmex purpureus</i> ) clear obstructive vegetation from their trails [106].                                                                                                                                                                                                                                                                                                                                                              |
| Destruction of roads/paths/trails | <b>Resist</b> destruction by building protected routes                                                                | Blind termites, <i>Hospitalitermes sharpi</i> , protect foraging routes by lining the trail with large and small soldiers from the colony [23].<br><br>Several ant species build walled trenches (eg. <i>Dorylus wilverthi</i> , <i>Dorylus nigricans</i> , <i>Labidus praedator</i> , <i>Pheidologeton diversus</i> [107]).                                                                                                                                                                                                                                                                          |

|                                                   |                                                                                                          |                                                                                                                                                                                                                                                                                                                                                                                                             |
|---------------------------------------------------|----------------------------------------------------------------------------------------------------------|-------------------------------------------------------------------------------------------------------------------------------------------------------------------------------------------------------------------------------------------------------------------------------------------------------------------------------------------------------------------------------------------------------------|
|                                                   |                                                                                                          | <i>Formica lugubris</i> build extra, redundant trails in their internest network. This allows the colony to resist disruptions that would otherwise isolate nests in the colony network. It also allows for redirection along other edges if a disturbance occurs [21].                                                                                                                                     |
|                                                   | <b>Redirect</b> flows along existing routes                                                              | Same as for traffic redirection [above; 21, 103].                                                                                                                                                                                                                                                                                                                                                           |
|                                                   | <b>Reconstruct</b> damage by rebuilding lost trail infrastructure                                        |                                                                                                                                                                                                                                                                                                                                                                                                             |
| Natural degradation/senescence of road/path/trail | <b>Resist</b> degradation through regular maintenance                                                    | Colonies of <i>A. columbica</i> regularly maintain and construct trail networks by removing litter items from important trails [105].<br><br>Workers of <i>Eciton burchelli</i> use their bodies to plug holes along the trail [108].<br><br>Pharaoh's ants ( <i>Monomorium pharonis</i> ) use U-turns to increase pheromone deposition thereby reinforcing trails [109].                                   |
|                                                   | <b>Redirect</b> flows along better maintained routes; redirect around damaged or suboptimal stretches    |                                                                                                                                                                                                                                                                                                                                                                                                             |
|                                                   | <b>Reconstruct</b> by investing in rebuilding after failure has occurred                                 |                                                                                                                                                                                                                                                                                                                                                                                                             |
| <b>Communication networks</b>                     |                                                                                                          |                                                                                                                                                                                                                                                                                                                                                                                                             |
| <b>Disruption type</b>                            | <b>Pathways to resilience</b>                                                                            | <b>Social insect example</b>                                                                                                                                                                                                                                                                                                                                                                                |
| Loss or degradation of signal                     | <b>Resist</b> by using multi-component signals, or multiple signal modalities                            | Honey bees ( <i>Apis</i> sp) use a 'waggle dance' to communicate information about food source location and quality via auditory, vibrational, tactile, olfactory and gustatory cues; <i>Aphanogaster</i> workers use combination of pheromone and stridulation (auditory) to recruit nest mates to foods [110].<br><br>Giant hornets ( <i>Vespa mandarina</i> ) use multi-component alarm pheromone [111]. |
|                                                   | <b>Redirect</b> by seeking signal elsewhere (example, ants choosing new route if pheromone trail doesn't | <i>Laisus niger</i> workers turn back (u-turn) if trail deviates from their preferred direction of travel [104].                                                                                                                                                                                                                                                                                            |

|                                                              |                                                                                                                                                        |                                                                                                                                                                                                                                                                                                                                                                                                                                                                                                                            |
|--------------------------------------------------------------|--------------------------------------------------------------------------------------------------------------------------------------------------------|----------------------------------------------------------------------------------------------------------------------------------------------------------------------------------------------------------------------------------------------------------------------------------------------------------------------------------------------------------------------------------------------------------------------------------------------------------------------------------------------------------------------------|
|                                                              | lead to resource)                                                                                                                                      |                                                                                                                                                                                                                                                                                                                                                                                                                                                                                                                            |
|                                                              | <b>Reconstruct</b> by repairing communications infrastructure (example: reapplying pheromone)                                                          | Argentine ants ( <i>Linepithima humile</i> ) constantly lay new pheromone trail as they walk, thus allowing them to repair pheromone trails [112].                                                                                                                                                                                                                                                                                                                                                                         |
| Loss of signaling units                                      | <b>Resist</b> by having extra units on hand (redundancy) or having homogeneous network topology                                                        | Several social insect species have inactive workers that can potentially undertake signaling tasks when individuals are lost [54, 71-73].<br><br>Small colonies of the wasp <i>Ropalidia marginata</i> have a homogeneous network structure that is resistant to the loss of individuals [4].                                                                                                                                                                                                                              |
|                                                              | <b>Redirect</b> signal to remaining units                                                                                                              |                                                                                                                                                                                                                                                                                                                                                                                                                                                                                                                            |
|                                                              | <b>Reconstruct</b> by rebuilding lost section of communication infrastructure (example, individuals recruited from a different task)                   |                                                                                                                                                                                                                                                                                                                                                                                                                                                                                                                            |
| <b>Supply chain</b>                                          |                                                                                                                                                        |                                                                                                                                                                                                                                                                                                                                                                                                                                                                                                                            |
| <b>Disruption type</b>                                       | <b>Pathways to resilience</b>                                                                                                                          | <b>Social insect example</b>                                                                                                                                                                                                                                                                                                                                                                                                                                                                                               |
| Loss of resource supplier/ increase in demand for a resource | <b>Resist</b> by having multiple backup suppliers (dual or multiple sourcing); by ensuring adequate stockpiles (warehousing), and adequate forecasting | Many ant species forage independently, leading to multiple 'suppliers'.<br><br>On average, meat ant colonies monopolize 2.7 (range 0-6) 'food trees'(containing colonies of sap sucking hemipterans) which the ants are dependent upon for carbohydrates [113].<br><br>Honey bees, bumble bees and stingless bees store nectar and pollen; Mexican honey wasps store nectar; several ant species have 'repletes' which function as resource warehouses [57, 58, 60].<br><br>Some ants use 'outstations' to store food [58] |
|                                                              | <b>Redirect</b> to backup supplier; to alternative supply (warehouses or backup suppliers)                                                             | Honey bees are able to redirect foraging efforts to profitable nectar sources as they change over time. [114].<br><br>Ant colonies can redirect to better food sources if food sources change in quality [33].                                                                                                                                                                                                                                                                                                             |
|                                                              | <b>Reconstruct</b> by sourcing additional suppliers and building additional                                                                            | Honey bees build additional storage cells after an influx of pollen or nectar (56)                                                                                                                                                                                                                                                                                                                                                                                                                                         |

|                                 |                                                                                                                                                                                      |                                                                                                                                                                                                                                                                                                                                                                                                                                                                                                                                                  |
|---------------------------------|--------------------------------------------------------------------------------------------------------------------------------------------------------------------------------------|--------------------------------------------------------------------------------------------------------------------------------------------------------------------------------------------------------------------------------------------------------------------------------------------------------------------------------------------------------------------------------------------------------------------------------------------------------------------------------------------------------------------------------------------------|
|                                 | warehouse space                                                                                                                                                                      |                                                                                                                                                                                                                                                                                                                                                                                                                                                                                                                                                  |
| Loss of distributors/work force | <b>Resist</b> by maintaining backup workforce, or redundant workers                                                                                                                  | Honey bees and ants appear to maintain a large reserve workforce of inactive or redundant individuals that become activated when the colony is attacked or a high value resource is discovered [54, 71-73].                                                                                                                                                                                                                                                                                                                                      |
|                                 | <b>Redirect</b> to backup workers                                                                                                                                                    | In bumblebees( <i>Bombus sp</i> ), experimental decreases in colony resources (which could naturally occur with the loss of work force), resulted in task switching behavior among foragers and within-nest workers Conversely, some ants, such as <i>Pogonomyrmex badius</i> , do not reallocate workers from other castes to fill labour gaps [115].                                                                                                                                                                                           |
|                                 | <b>Reconstruct</b> by increasing backup workforce, or redundant workers                                                                                                              | Honey bees, <i>A. mellifera</i> , will hasten maturation of brood and the individuals will begin foraging earlier in life after disturbances, such as the loss of work force. [67, 99].                                                                                                                                                                                                                                                                                                                                                          |
| Surge in supply of a product    | <b>Resist</b> by proactively building extra warehouse/storage facilities, having additional transporters                                                                             | Workers can be enlisted from other tasks, or from the inactive workforce to aid in product transportation [for examples see, 61, 116, 71-73].<br><br><i>Harvester ants, Pogonomyrmex barbatus, are solitary foragers but increase foraging activity based on interactions with other foragers and the numbers of returning and outgoing foragers in the nest [121].</i><br><br><i>Argentine ants recruit individuals to a new food source from a trunk trail. This allows for rapid exploitation when a resource increases in quality [122].</i> |
|                                 | <b>Redirect</b> oversupply to existing warehouse/storage facilities; re-assign workers to act as transporters. Alternatively, reallocate workers to new roles of products in demand. | <i>Eciton burchelli</i> split the central trail of their foraging column into lateral trails to cover a larger foraging area during times of high food densities [117].<br><br><i>Pogonomyrmex sp</i> increases activity during times of greater food abundance, with more foragers and more time searching for available food [118].<br><br>Italian honey bees, <i>Apis mellifera ligustica</i> , that forage for pollen will switch to nectar foraging when pollen stores are full, or cease activity and stay within the hive [61].           |
|                                 | <b>Reconstruct</b> by building new warehouse/ storage facilities; build additional                                                                                                   |                                                                                                                                                                                                                                                                                                                                                                                                                                                                                                                                                  |

|                                  |                                                                  |                                                                                                                                                                                                                       |
|----------------------------------|------------------------------------------------------------------|-----------------------------------------------------------------------------------------------------------------------------------------------------------------------------------------------------------------------|
|                                  | transportation infrastructure                                    |                                                                                                                                                                                                                       |
| Destruction of warehouse/storage | <b>Resist</b> by having multiple, spatially distinct warehouses  | <i>Crematogaster torosa</i> maintains multiple spatially distinct outstations [61].<br><br>Replete ants are spread between spatially isolated galleries [58].                                                         |
|                                  | <b>Redirect</b> to undamaged warehouses or directly to suppliers | The ant, <i>Leptothorax albipennis</i> , and honeybee, <i>Apis mellifera</i> , utilise scouts to identify suitable undamaged nest sites that the colony can move to, in the event that their nest is destroyed [123]. |
|                                  | <b>Reconstruct</b> warehouses                                    |                                                                                                                                                                                                                       |
