# Supplementary material
Source: PubMed Central journal article supplement (PMC4843670)
Supplement: rsif20151022supp2.pdf [file rsif20151022supp2.pdf]

| Outstanding questions in social insect infrastructure resilience |                                                                                                                                                          |
|------------------------------------------------------------------|----------------------------------------------------------------------------------------------------------------------------------------------------------|
| Transportation networks                                          | Do pheromone-based trail systems invest less in topological robustness than systems based on high-cost physical trails/tunnels?                          |
|                                                                  | How do social insect colonies redirect traffic through the network if one path becomes blocked?                                                          |
|                                                                  | How is the collective repair of damaged trails coordinated?                                                                                              |
|                                                                  | How do colonies decide between investing in new trails versus maintain old trails?                                                                       |
| Communications networks                                          | How do communication networks reform following the random or targeted (most connected) loss of individuals?                                              |
|                                                                  | How does colony size influence homogeneity of the communication network?                                                                                 |
|                                                                  | How does the use of direct or indirect communication mechanisms influence the ability to recover following the loss of individuals?                      |
| Supply chains                                                    | Do social insects engage in forecasting to determine how much storage space to invest in?                                                                |
|                                                                  | Do social insect colonies maintain extra suppliers? Does the number of 'backup' suppliers correlate with the stability of resources?                     |
| Memory and cognition                                             | How does memory type (external/internal) impact resilience to loss of individuals?                                                                       |
|                                                                  | How does individual cognitive complexity influence resilience to loss of individuals?                                                                    |
|                                                                  | How does the length of memory influence colony resilience?                                                                                               |
| Economics of resilience                                          | Is investment in resistance mechanisms associated with high frequency disturbances?                                                                      |
|                                                                  | Is investment in reconstruction mechanisms associated with high impact disturbances?                                                                     |
|                                                                  | What is the relative cost of resistance, redirection and reconstruction?                                                                                 |
|                                                                  | Can colonies adjust their relative investment into resistance, redirection and reconstruction to account for changes in disturbance frequency/magnitude? |
|                                                                  | Do the benefits of investing in infrastructure resilience exceed the costs?                                                                              |
| Interdependency and failure cascades                             | Do social insects exhibit failure cascades?                                                                                                              |
|                                                                  | Do social insects have mechanisms for preventing failure cascades?                                                                                       |
|                                                                  | Do social insects have mechanisms for preventing failures from propagating to connected infrastructure systems?                                          |
|                                                                  | Are phase transitions common in insect infrastructures?                                                                                                  |
| Other                                                            | How does the degree of centralisation influence colony resilience?                                                                                       |
